# An upstream open reading frame represses translation of chicken PPAR $\gamma$ transcript variant 1

Yankai Chu<sup>1,2,3</sup>, Jiaxin Huang<sup>1,2,3</sup>, Guangwei Ma<sup>1,2,3</sup>, Tingting Cui<sup>1,2,3</sup>, Xiaohong Yan<sup>1,2,3</sup>, Hui Li<sup>1,2,3</sup>, Ning Wang<sup>1,2,3\*</sup>

<sup>1</sup> Key Laboratory of Chicken Genetics and Breeding, Ministry of Agriculture and Rural Affairs, Harbin, China

<sup>2</sup> Key Laboratory of Animal Genetics, Breeding and Reproduction, Education Department of Heilongjiang Province, Harbin, China

<sup>3</sup> College of Animal Science and Technology, Northeast Agricultural University, Harbin, China

**Running title:** An upstream ORF represses chicken PPAR $\gamma$ 1 translation

\*Corresponding Author:

Ning Wang (email: [wangning@neau.edu.cn](mailto:wangning@neau.edu.cn))

**Keywords:** PPAR $\gamma$ ; 5' untranslated region (UTR); upstream ORF; translational repression

## Abstract

Peroxisome proliferator-activated receptor  $\gamma$  (PPAR $\gamma$ ) is a master regulator of adipogenesis. The *PPAR $\gamma$*  gene produces various transcripts with different 5'-untranslated regions (5' UTRs) because of alternative promoter usage and splicing. The 5' UTR plays important roles in posttranscriptional gene regulation. However, to date, the regulatory role and underlying mechanism of 5' UTRs in the posttranscriptional regulation of PPAR $\gamma$  expression remain largely unclear. In this study, we investigated the effects of 5' UTRs on posttranscriptional regulation using reporter assays. Our results showed that the five PPAR $\gamma$  5' UTRs exerted different effects on reporter gene activity. Bioinformatics analysis showed that chicken PPAR $\gamma$  transcript 1 (*PPAR $\gamma$ 1*) possessed an upstream open reading frame (uORF) in its 5' UTR. Mutation analysis showed that a mutation in the uORF led to increased *Renilla* luciferase activity and PPAR $\gamma$  protein expression, but decreased *Renilla* luciferase and *PPAR $\gamma$ 1* mRNA expression. mRNA stability analysis using real-time RT-PCR showed that the uORF mutation did not interfere with mRNA stability, but promoter activity analysis of the cloned 5' UTR showed that the uORF mutation reduced promoter activity. Furthermore, *in vitro* transcription/translation assays demonstrated that the uORF mutation markedly increased the translation of *PPAR $\gamma$ 1* mRNA. Collectively, our results indicate that the uORF represses the translation of chicken *PPAR $\gamma$ 1* mRNA.

# Introduction

Peroxisome proliferator-activated receptor  $\gamma$  (PPAR $\gamma$ ) is a member of the PPAR subfamily of ligand-activated transcription factors. *In vitro* and *in vivo* studies have demonstrated that PPAR $\gamma$  is essential for adipocyte differentiation, adipocyte survival, adipocyte function, insulin sensitivity, and lipogenesis (Lehrke and Lazar 2005; Lefterova *et al.* 2014). Synthetic PPAR $\gamma$  agonists have been used as therapeutic agents for diabetes and insulin insensitivity (Cariou *et al.* 2012).

The *PPAR $\gamma$*  gene is controlled by multiple alternative promoters (Aprile *et al.* 2014; Chandra *et al.* 2017). Because of alternative promoter usage and splicing, the *PPAR $\gamma$*  gene can produce multiple transcript variants, resulting in expression of two PPAR $\gamma$  protein isoforms that differ in the N-terminal. All PPAR $\gamma$  transcript variants differ in their 5'-untranslated regions (5' UTRs) (McClelland *et al.* 2014). These PPAR $\gamma$  5' UTR isoforms have distinct tissue distributions (Ahmadian *et al.* 2013), suggesting that the 5' UTRs may be involved in posttranscriptional and translational regulation of the *PPAR $\gamma$*  gene.

The 5' UTRs of mRNAs exert crucial roles in posttranscriptional and translational regulation. Several *cis*-regulatory elements within the 5' UTRs have been identified, such as the 5' cap structure (Mitchell *et al.* 2010), upstream open reading frames (uORFs) (Hood *et al.* 2009; Barbosa *et al.* 2013), internal ribosome entry sites (IRES) (Xia and Holcik 2009), terminal oligo-pyrimidine tracts, secondary structures, and G-quadruplexes (Yamashita *et al.* 2008; Bugaut and Balasubramanian 2012). These *cis*-regulatory elements can function via various mechanisms, controlling

mRNA stability (Nasif *et al.* 2018), nuclear export, localization, and translation efficiency (Araujo *et al.* 2012). Of these *cis*-regulatory elements, uORFs have been widely studied. Bioinformatics analysis showed that about 50% of human transcripts contain uORFs (Suzuki *et al.* 2000; Iacono *et al.* 2005; Calvo *et al.* 2009), and experimental studies have revealed that a number of uORFs can affect the expression of the main downstream ORFs by inducing mRNA decay or by regulating translation (Iacono *et al.* 2005; Crowe *et al.* 2006; Sathirapongsasuti *et al.* 2011).

Given the importance of PPAR $\gamma$  in various physiological and pathological processes, *PPAR $\gamma$*  gene regulation has been extensively studied at the genomic and transcriptional levels in recent decades (Lee and Ge 2014). The half-life of PPAR $\gamma$  mRNA and protein is short and PPAR $\gamma$  protein can be posttranslationally modified in various ways (van Beekum *et al.* 2009; Katsura *et al.* 2014), suggesting that posttranscriptional regulation is crucial for its function. However, to date, posttranscriptional regulation by the 5' UTR has been mostly unexplored. In the present study, we investigated the posttranscriptional regulation of chicken PPAR $\gamma$  by the 5' UTR. Of interest, we demonstrated that translation of chicken PPAR $\gamma$  transcript variant 1 (*PPAR $\gamma$ 1*) is repressed by a uORF that is absent in human and mouse PPAR $\gamma$  transcripts.

## Materials and Methods

### Cell culture

DF1 cells were purchased from the Institute of Biochemistry and Cell Biology,

Chinese Academy of Sciences, and the immortalized chicken preadipocyte cell line 1 (ICP1) was generated in our laboratory (Wang *et al.* 2017). All cells were grown in Dulbecco's modified Eagle's medium supplemented with 10% fetal bovine serum and 1% penicillin/streptomycin, at 37 °C and 5% CO<sub>2</sub>. The culture medium was changed two to three times per week and cells were passaged 1:3 or 1:5 as needed.

## Plasmid construction

The reporter vector psi-CHECK2 (Invitrogen, Carlsbad, CA, USA) was modified by site-directed mutagenesis, such that the ATG of *Renilla* luciferase was mutated to TTG, and the resulting reporter vector was named psi-CHECK2-Mut. The DNA sequences corresponding to the five PPAR $\gamma$  5' UTRs plus initiation codon ATG were synthesized and inserted into the *Nhe*I restriction site upstream of the *Renilla* luciferase gene. Thus, *Renilla* luciferase in psi-CHECK2-Mut would be expressed with PPAR $\gamma$  with indicated 5' UTRs and translated with the initiation codon ATG of PPAR $\gamma$ .

To test the promoter activity of the DNA sequence corresponding to chicken PPAR $\gamma$ 1 5' UTR, the wild-type or uORF-mutant 5' UTRs were subcloned into the *Bam*HI and *Xho*I restriction sites of pGL3-basic vector and named pGL3-PPAR $\gamma$ -WT and pGL3-PPAR $\gamma$ -Mut, respectively.

For PPAR $\gamma$  expression constructs, the full-length coding sequence of PPAR $\gamma$ 1 was PCR amplified from the cDNA derived from DF-1 cells with a set of primers (forward primer: 5'-GAATTCATGGTTGACACAGAAATGCCGT-3' and reverse primer: 5'-CCTCGAGGAGGATAAGAACTACTATCGCC-3' and cloned into the

*Bam*HI and *Eco*RI restriction sites of the pcDNA3.1 expression vector. The synthesized wild-type or uORF mutated 5' UTR of PPAR $\gamma$  was inserted upstream of PPAR $\gamma$  ORF in pcDNA3.1 vector with *Nhe*I restriction sites and named pcDNA3.1-PPAR $\gamma$ -WT and pcDNA3.1-PPAR $\gamma$ -Mut, respectively. All constructs were confirmed by DNA sequencing and restriction enzyme digestion.

## Quantitative real-time PCR assays (qRT-PCRs)

Total RNA was isolated from ICP1 or DF1 cells by using the RNeasy Plus Mini Kit (Qiagen, Hilden, Germany) according to the manufacturer's protocol, and the first-strand cDNA was synthesized from 1  $\mu$ g of total RNA with oligo dT or random primers using ImProm-II reverse transcriptase (Promega, Madison, WI, USA). The qPCR reactions were performed in a 20  $\mu$ L reaction mixture using SYBR Green PCR Master Mix (Roche, Madison, WI, USA). The primers were as follows: *hRluc* (forward 5'-TGATCGAGTCCTGGGACGA-3', reverse 5'-ACAATCTGGACGACGTCGGG-3'); wild-type and uORF-mutated PPAR $\gamma$ 1 (forward 5'-GGAGTTTATCCCACCAGAAG-3', reverse 5'-AATCAACAGTGGTAAATGGC-3'); *NONO* (forward 5'-AGAAGCAGCAGCAAGAAC-3', reverse 5'-TCCTCCATCCTCCTCAGT-3'). qPCR was carried out in an ABI 7500 real-time PCR system (Applied Biosystems, Foster City, CA, USA), and PCR results were recorded as threshold cycle numbers (Ct). The fold change in the target gene expression, normalized to the expression of an internal control gene (*NONO*) and relative to the expression at time point 0 (Normann *et al.* 2016), was calculated using the  $2^{-\Delta\Delta CT}$  method (Livak and Schmittgen 2001).

The results are presented as the mean  $\pm$  SEM of three independent experiments.

## **Protein isolation and western blot analysis**

The ICP1 cells were transfected with either pcDNA3.1-PPAR $\gamma$ -WT or pcDNA-PPAR $\gamma$ -Mut vector. At 48 h post-transfection, cells were washed twice with PBS and lysed using radioimmunoprecipitation assay (RIPA) buffer (Beyotime Institute of Biotechnology, Beijing, China) supplemented with 1% protease inhibitor mixture. Equal amounts of protein extracts were separated by sodium dodecyl sulfate-PAGE, transferred onto Immun-Blot PVDF membranes (Millipore, Billerica, MA, USA). The membrane was blocked for 1 to 2 h at room temperature with Tris-buffered saline containing 0.1% Tween and 5% non-fat dry milk, and immunoblotted with rabbit polyclonal antibody to chicken PPAR $\gamma$  (1:1000 dilution) or  $\beta$ -actin (1:1000 dilution, ZSGB-BIO, Beijing, China) at room temperature for 1 h. Horseradish peroxidase-conjugated goat anti-mouse or goat anti-rabbit IgG (Promega; 1:10,000) was incubated for 1 h at room temperature and then washed four times with PBS-Tween for 20 min. The immunoreactive bands were visualized using an ECL Plus detection kit (HaiGene Biotechnology, Harbin, China). Immunoreactive protein levels were determined semi-quantitatively by densitometric analysis using the UVP system Labworks TM software 3.0 (UVP, Upland, CA, USA). Each western blot analysis was performed at least three times.

## **Dual-luciferase reporter assays**

Transient transfections were performed using Lipofectamine 2000 (Invitrogen, Carlsbad, CA, USA). Cells were plated at  $1.0$  to  $1.5 \times 10^5$  cells per well in 24-well

plates. For the 5' UTR reporter gene assay, 1 µg of the indicated reporter constructs was transfected into each well. For the promoter reporter gene assay, 0.8 µg of the indicated reporter constructs and 0.4 µg of pRL-TK (Promega), as an internal control of transfection efficiency, were co-transfected into each well. Luciferase activity was analyzed at 48 h post-transfection, using a dual-luciferase reporter kit (Promega) as per the manufacturer's instructions. All luciferase reporter assays were performed at least three times in quadruplicates.

### ***In vitro* transcription and translation**

Plasmids pcDNA3.1-PPAR $\gamma$ -WT and pcDNA3.1-PPAR $\gamma$ -Mut were linearized, purified by agarose gel electrophoresis, eluted with diethylpyrocarbonate-treated H<sub>2</sub>O, and quantified. Equal amounts (1 µg) of linearized DNA were used as templates for *in vitro* transcription in the T7 RiboMAX Large Scale RNA Production System (Promega) according to the manufacturer's protocol. Capped mRNAs were generated using the Ribo m<sup>7</sup>G Cap Analog (Promega). The capped mRNAs were digested with DNase I and purified with the RNeasy kit (Qiagen) and quantified. The size and integrity of the purified mRNAs were assessed by gel electrophoresis. The mRNA outputs of pcDNA3.1-PPAR $\gamma$ -WT and pcDNA3.1-PPAR $\gamma$ -Mut were analyzed by absolute qRT-PCR. *In vitro* translation reactions were performed in nuclease-treated Rabbit Reticulocyte Lysate (Promega) as described by the manufacturer. Equal amounts of the capped mRNA (2 µg) derived from pcDNA3.1-PPAR $\gamma$ -WT or pcDNA3.1-PPAR $\gamma$ -Mut construct were used as the template for *in vitro* translation, which was performed for 60 min at 30 °C, and the reactions were stopped by



transferring the tubes to ice. Biotinylated lysine residues were added to the translation reaction as a precharged  $\epsilon$ -labeled biotinylated lysine-tRNA complex (Transcend tRNA; Promega) and incorporated into nascent proteins during translation. The translated protein was analyzed using a Transcend Non-Radioactive Translation Detection System (Promega).

## RNA stability assay

The stability of luciferase mRNA transcripts from the indicated constructs (PPAR $\gamma$ 1-5'UTR-WT and PPAR $\gamma$ 1-5'UTR-Mut) was determined by measuring the amount of *hRluc* luciferase mRNA at selected intervals: 0 (control), 3, 6, 9, and 12 h, following the addition of 5 mg/mL actinomycin D (Sigma-Aldrich, St. Louis, MO, USA) at 48 h post-transfection. Time-course intervals were chosen based on the manufacturer's data of *luc2* mRNA half-life (approximately 2 h). For mRNA expression analysis, total RNA (1  $\mu$ g) was reverse-transcribed into cDNA using the PrimeScript RT reagent Kit with gDNA Eraser (Takara, Shiga, Japan), and relative mRNA expression was determined by real-time PCR using FastStart Universal SYBR Green Master [Rox] (Roche) with *hRluc* primers as described above. Relative mRNA levels were normalized to the *NONO* gene and to expression at time point 0 (Normann *et al.* 2016) and calculated using the  $2^{-\Delta\Delta CT}$  method (Livak and Schmittgen 2001).

## Bioinformatics analysis

Online software programs used to predict the potential *cis*-regulatory elements of PPAR $\gamma$  5' UTR: StarORF (<http://star.mit.edu/index.html>) (Ceraaj *et al.* 2009), UTRscan (<http://itbtools.ba.itb.cnr.it/utrscan>) (Grillo *et al.* 2010), and Reg RNA2.0

(<http://regrna2.mbc.nctu.edu.tw>) (Chang *et al.* 2013). Preliminary RNA secondary structures were predicted using Vienna RNAfold 2.0 (<http://rna.tbi.univie.ac.at/cgi-bin/RNAfold.cgi>) (Hofacker 2003). Intrinsic protein disorder analyses were made using PSIPRED protein sequence analysis workbench (<http://bioinf.cs.ucl.ac.uk/psipred/>) (Buchan *et al.* 2013). All bioinformatic computations were performed using default prediction parameters.

## Statistical analysis

Experimental data were analyzed using GraphPad Prism software (GraphPad Inc., San Diego, CA, USA). The results were presented as mean  $\pm$  SEM. For comparison of two groups, statistical analysis was performed using two-tailed Student's *t*-test and linear regression. *P* values  $< 0.05$  (\*) were considered significant, *P* values  $< 0.01$  (\*\*) were considered highly significant. For multiple comparisons, one-way analysis of variance (ANOVA) was used to determine significance, followed by Tukey's post hoc test.

## Data availability

Strains, plasmids and cell lines are available upon request. The authors affirm that all data necessary for confirming the conclusions of the article are present within the article, figures and supplemental information.

## Results

### The effects of PPAR $\gamma$ 5' UTRs on reporter gene expression

We previously identified five different chicken PPAR $\gamma$  transcript variants (*PPAR $\gamma$*

1 to 5) by 5' rapid amplification of cDNA ends (5' RACE) in chicken abdominal adipose tissue (Duan *et al.* 2015). These chicken PPAR $\gamma$  transcript variants encode two protein isoforms (PPAR $\gamma$ 1 and PPAR $\gamma$ 2) that differ in their N-terminal extension. Chicken PPAR $\gamma$ 2 contains 6 additional amino acids at the N-terminus compared with PPAR $\gamma$ 1. These five chicken PPAR $\gamma$  transcript variants differed in 5' UTR sequence and length, and had different tissue distribution patterns (Duan *et al.* 2015), suggesting that 5' UTRs may play a role in the posttranscriptional regulation of *PPAR $\gamma$*  gene expression. To investigate the posttranscriptional regulatory roles of the five 5' UTR isoforms on chicken *PPAR $\gamma$*  gene expression, we constructed their respective 5' UTR reporter constructs. Briefly, we first generated the 5' UTR reporter vector by mutating the ATG start codon of the *Renilla* luciferase gene to TTG in the psi-CHECK2 vector (Invitrogen) by site-directed mutagenesis (Kubokawa *et al.* 2010); the resulting 5' UTR reporter construct, named psi-CHECK2-Mut, was used to construct the five chicken PPAR $\gamma$  5' UTR reporters. Then, the five DNA fragments corresponding to the five different PPAR $\gamma$  5' UTRs plus the ATG start codon were synthesized and inserted at the *Nhe*I restriction site upstream of the *Renilla* luciferase gene in psi-CHECK2-Mut to yield five chicken PPAR $\gamma$  5' UTR reporter constructs: PPAR $\gamma$ 1-5'UTR, PPAR $\gamma$ 2-5'UTR, PPAR $\gamma$ 3-5'UTR, PPAR $\gamma$ 4-5'UTR, and PPAR $\gamma$ 5-5'UTR.

We transfected these five 5' UTR reporters into ICP1 and DF1 cells and measured *Renilla* luciferase activity. The reporter gene assay showed that these five 5' UTR reporters displayed different luciferase activities. As shown in Fig. 1A and 1B,

PPAR $\gamma$ 1-5'UTR exhibited the highest luciferase activity in ICP1 cells and the second-highest activity in DF1 cells. PPAR $\gamma$ 5-5'UTR exhibited the highest activity in DF1 cells and the second-highest activity in ICP1 cells. PPAR $\gamma$ 3-5'UTR exhibited the lowest activity in both ICP1 and DF1 cells. PPAR $\gamma$ 2-5'UTR and PPAR $\gamma$ 4-5'UTR exhibited similar reporter activity in both ICP1 and DF1 cells. These results support our speculation that the 5' UTR regulates chicken *PPAR $\gamma$*  gene expression.

## Bioinformatics analysis of chicken PPAR $\gamma$ 5' UTRs

To gain insight into the molecular mechanisms by which the 5' UTRs regulate gene expression, we performed a bioinformatics analysis of these five 5' UTR sequences using the online software programs StarORF, UTRscan, and RegRNA 2.0. Bioinformatics analysis showed that PPAR $\gamma$ 1 5' UTR contains a 54-nucleotide (nt)-long uORF (PPAR $\gamma$ 1 uORF), PPAR $\gamma$ 3 5' UTR has a 12-nt-long uORF (PPAR $\gamma$ 3 uORF) and a putative IRES element, and PPAR $\gamma$ 5 5' UTR has two uORFs, which are 15 and 51 nt long, respectively. No putative *cis*-regulatory elements were predicted in PPAR $\gamma$ 2 and PPAR $\gamma$ 4 5' UTR sequences. The PPAR $\gamma$ 1 uORF is located in its 5' UTR from nucleotides -24 to -79 (relative to the start codon AUG of the PPAR $\gamma$  protein-coding ORF, where A is +1; Fig. 2A), and the uORF AUG (uAUG) resides in a favorable Kozak consensus context, suggesting that there is a high probability that scanning ribosomes consistently initiate the translation at this uAUG codon to encode a 17-amino acid peptide (MGRPGEFIPPEGNSFSG; Fig. 2A).

## The effect of PPAR $\gamma$ 1 uORF on gene expression

Upstream ORFs have emerged as a major posttranscriptional regulatory element in eukaryotic species (Wen *et al.* 2009). The above bioinformatics analysis showed that, of these five PPAR $\gamma$  5'UTR isoforms, three contained uORFs, which led us to speculate that these uORFs may be implicated in posttranscriptional regulation of chicken PPAR $\gamma$ . Herein, we focused our attention on the PPAR $\gamma$ 1 uORF. Of these five chicken PPAR $\gamma$  transcript variants, PPAR $\gamma$  transcript variant 1 (PPAR $\gamma$ 1) is highly expressed in various chicken tissues, including abdominal adipose, spleen, and liver (Duan *et al.* 2015), which is consistent with our results showing that PPAR $\gamma$ 1 5' UTR had high reporter activity (Fig. 1A and 1B). Unlike the other two uORF-containing 5' UTR isoforms, PPAR $\gamma$ 1 5' UTR presented the largest uORF, and its uAUG was in a favorable Kozak consensus context.

To test our speculation, we investigated the effect of PPAR $\gamma$ 1 uORF on posttranscriptional regulation of the *Renilla* luciferase reporter gene. We generated a uORF-mutated reporter construct, named PPAR $\gamma$ 1-uORF-Mut, by mutating the uAUG to a stop codon UAG (AUG > UAG) of the PPAR $\gamma$ 1 uORF by site-directed mutagenesis. Transient transfection and reporter gene assays showed that the luciferase activities of the mutant reporter construct (PPAR $\gamma$ 1-uORF-Mut) were 3- and 2.5-fold higher, respectively, than those of the wild-type PPAR $\gamma$ 1 5' UTR reporter construct (PPAR $\gamma$ 1-5'UTR-WT) in ICP1 and DF1 cells ( $P < 0.01$ , Fig. 2B). These results indicate that this uORF functions as an intrinsic repressor for downstream ORF expression. To further understand the molecular mechanism underlying the repressive

effect of this uORF, we quantified the relative mRNA levels of *Renilla* luciferase (*hRluc*) in cells transfected with the same amount of PPAR $\gamma$ 1-uORF-Mut and PPAR $\gamma$ 1-5'UTR-WT, respectively. Surprisingly, in contrast to the reporter gene assay results (Fig. 2B), quantitative real-time RT-PCR showed that transfection of PPAR $\gamma$ 1-uORF-Mut resulted in lower *hRluc* mRNA expression compared with the PPAR $\gamma$ 1-5'UTR-WT in both ICP1 ( $P < 0.05$ ) and DF1 cells ( $P < 0.01$ ) (Fig. 2C). Thus, the luciferase reporter gene assay and quantitative RT-PCR results together allow us to conclude that PPAR $\gamma$ 1 uORF inhibits *hRluc* translation.

## Inhibition of PPAR $\gamma$ 1 translation by the uORF

To exclude the possibility that the effect of this uORF is reporter gene-specific, we generated full-length PPAR $\gamma$ 1 expression constructs with either the wild-type or uORF-mutated 5' UTR (AUG > UAG), termed pcDNA3.1-PPAR $\gamma$ -WT and pcDNA3.1-PPAR $\gamma$ -Mut, respectively. Then, ICP1 cells were transfected with pcDNA3.1-PPAR $\gamma$ -WT or pcDNA3.1-PPAR $\gamma$ -Mut alone, and PPAR $\gamma$  protein expression was assayed by western blot. The western blot analysis showed that PPAR $\gamma$ 1 protein levels were significantly higher in the DF1 cells transfected with pcDNA3.1-PPAR $\gamma$ -Mut than with the pcDNA3.1-PPAR $\gamma$ -WT ( $P < 0.01$ , Fig. 3A and 3B). In parallel, we investigated the PPAR $\gamma$ 1 mRNA expression. Real-time RT-PCR analysis showed that PPAR $\gamma$ 1 mRNA expression levels were significantly lower in both ICP1 and DF1 cells transfected with pcDNA3.1-PPAR $\gamma$ -Mut than with pcDNA3.1-PPAR $\gamma$ -WT (Fig. 3C). These results are consistent with those of the

reporter gene assay (Fig. 2C). Collectively, these results indicate that this uORF represses downstream PPAR $\gamma$ 1 translation.

## **No effect of PPAR $\gamma$ 1 uORF on mRNA stability**

Our results showed that the uORF mutation resulted in reduced mRNA expression levels of *hRluc* and *PPAR $\gamma$ 1* (Fig. 2C and 3C). There are two possibilities to explain this. First, the uORF mutation may affect mRNA stability. Previous studies have indicated that uORF can reduce mRNA expression via mRNA destabilization (Dikstein 2012; Dvir *et al.* 2013). The other possibility is that the cloned chicken PPAR $\gamma$ 1 5' UTR in our 5' UTR reporters and PPAR $\gamma$  expression vectors may contain promoter activity, and uORF mutation may lead to reduced promoter activity. To test whether this uORF mutation affected mRNA stability, using real-time RT-PCR, we determined the mRNA decay rate of *hRluc* in cells transfected with PPAR $\gamma$ 1-5'UTR-WT or PPAR $\gamma$ 1-5'UTR-Mut at 0, 3, 6, 9, and 12 h following treatment with actinomycin D. As shown in Fig. 4, no significant difference in *hRluc* mRNA half-life was observed over a 12-h period between cells transfected with PPAR $\gamma$ 1-5'UTR-WT or PPAR $\gamma$ 1-5'UTR-Mut (PPAR $\gamma$ 1-5'UTR-WT: 6.43 h; PPAR $\gamma$ 1-5'UTR-Mut: 5.90 h ( $P = 0.4146$ ). These results indicate that this uORF had no obvious effect on mRNA stability.

## **The effect of uORF mutation on promoter activity**

The genomic region corresponding to the 5' UTR is usually part of the promoter.

Our previous study demonstrated that the 108-bp sequence downstream of the transcription start site of *PPAR $\gamma$ 1*, which is part of the 5' UTR, had the highest promoter activity (Cui *et al.* 2018). To test whether the cloned PPAR $\gamma$ 1 5' UTR had promoter activity and whether the uORF mutation reduced it, we cloned DNA sequences corresponding to wild-type and uORF-mutated 5' UTRs of PPAR $\gamma$ 1 into luciferase reporter vector pGL3-Basic, named pGL3-PPAR $\gamma$ 1-WT and pGL3-PPAR $\gamma$ 1-Mut, respectively. A reporter gene assay showed that the pGL3-PPAR $\gamma$ 1-WT and pGL3-PPAR $\gamma$ 1-Mut displayed 111- and 90-fold higher luciferase reporter activity, respectively, than the pGL3-Basic empty vector in DF1 cells, and 180- and 120-fold higher luciferase reporter activity, respectively, than the pGL3-Basic empty vector in ICP1 cells, suggesting that the cloned PPAR $\gamma$ 1 5' UTR has promoter activity. By comparison, pGL3-PPAR $\gamma$ 1-Mut showed significantly lower luciferase activity than pGL3-PPAR $\gamma$ 1-WT in DF1 cells (Fig. 5A,  $P < 0.05$ ) and ICP1 cells (Fig. 5B,  $P < 0.01$ ). These results demonstrated that the cloned PPAR $\gamma$ 1 5' UTR had strong promoter activity and that the uORF mutation can result in reduced promoter activity. These findings explain why the mRNA expression levels of *hRluc* and *PPAR $\gamma$ 1* were reduced in the above study (Fig. 2C and 3C).

## **The effect of the uORF on *in vitro* translation of PPAR $\gamma$ 1**

The results reported here suggest that at the mRNA level, the uORF represses PPAR $\gamma$ 1 translation (Fig. 3A and 3B). To further validate this finding, we performed an *in vitro* transcription and translation assay. For *in vitro* transcription, equal amounts (1



μg) of linearized pcDNA3.1-PPAR $\gamma$ 1-WT or pcDNA3.1-PPAR $\gamma$ 1-Mut were used as templates to produce the *PPAR $\gamma$ 1* mRNA with wild-type and uORF-mutated 5' UTR using the T7 RiboMAX Large Scale RNA Production System. The results showed that, as expected, pcDNA3.1-PPAR $\gamma$ 1-WT and pcDNA3.1-PPAR $\gamma$ 1-Mut produced almost the same amount of PPAR $\gamma$ 1 mRNA (Fig. 6A). Equal amounts of the transcribed PPAR $\gamma$ 1 mRNA produced from pcDNA3.1-PPAR $\gamma$ 1-WT and pcDNA3.1-PPAR $\gamma$ 1-Mut were used for the *in vitro* translation assay. The *in vitro* translation assay results showed that more PPAR $\gamma$ 1 protein was synthesized with PPAR $\gamma$ 1 mRNA from pcDNA3.1-PPAR $\gamma$ 1-Mut than from pcDNA3.1-PPAR $\gamma$ 1-WT (Fig. 6B). Together, these results indicate that the uORF represses PPAR $\gamma$ 1 translation.

## **The PPAR $\gamma$ 1 uORF can be translated**

To gain insight into the molecular mechanism by which the uORF represses translation, we tested whether the uAUG of PPAR $\gamma$ 1 uORF was used for translation initiation. We generated a construct in which the uORF was fused in frame with the enhanced green fluorescent protein (EGFP) coding sequences, with no intervening in-frame stop codons, and named it pcDNA3.1-uORF-EGFP; pcDNA3.1-EGFP was used as a positive control. The ICP1 cells were transiently transfected with pcDNA3.1-uORF-EGFP or pcDNA3.1-EGFP and examined by microscopy and western blotting. Microscopy showed that the cells transfected with either pcDNA3.1-uORF-EGFP or pcDNA3.1-EGFP displayed GFP fluorescence (Fig. 7A).

Comparatively, GFP fluorescence intensity was lower in the cells transfected with pcDNA3.1-uORF-EGFP than with pcDNA3.1-EGFP (Fig. 7A). Consistent with these findings, western blot analysis showed that the uORF-EGFP fusion protein was expressed but at a lower level in the cells transfected with pcDNA3.1-uORF-EGFP compared with that in the cells transfected with pcDNA3.1-EGFP (Fig. 7B). Collectively, these data suggest that translation can indeed be initiated at the uAUG.

## Discussion

Investigating the molecular mechanisms that control PPAR $\gamma$  expression is critical for understanding adipogenesis, as well as pathological conditions such as obesity and diabetes. In the present study, we investigated PPAR $\gamma$  posttranscriptional regulation by 5' UTR. We demonstrated that a uORF, which is absent in human and mouse PPAR $\gamma$  transcripts, represses chicken PPAR $\gamma$  transcript variant 1 translation. To our knowledge, this is the first report of a uORF regulating *PPAR $\gamma$*  gene expression.

In the present study, we demonstrated that the five chicken PPAR $\gamma$  5' UTR isoforms exerted different effects on the reporter gene activity (Fig. 1A and 1B), and further study showed the 5' UTR uORF of PPAR $\gamma$ 1 represses reporter gene and PPAR $\gamma$ 1 translation. Sequence analysis revealed that the uAUG of the PPAR $\gamma$ 1 uORF resides in a favorable Kozak sequence context, which is the most efficient context for ribosome recognition and initiation of translation (Fig. 2A). In agreement with the bioinformatics prediction, we demonstrated that the uAUG could serve as a

translation start site (Fig. 7A and 7B). Furthermore, secondary structural analysis showed there was a stable loop structure within the uORF (Fig. S1), and the uORF mutation (AUG > UAG) was not able to alter the secondary structure of PPAR $\gamma$ 1 5' UTR (Fig. S1). Thus, we could rule out an effect of secondary structure alteration on PPAR $\gamma$ 1 expression.

The 17-amino acid PPAR $\gamma$ 1 uORF peptide was analyzed using the PSIPRED protein sequence analysis workbench. It was predicted to be a disordered peptide (Romero *et al.* 2001; Buchan *et al.* 2013). Disordered peptides are enriched with residues Gly, Pro, Arg, and Ser, which are potential targets for phosphorylation that could promote ribosome stalling during translation elongation or termination (Hayden and Jorgensen 2007; Johansson *et al.* 2011; Koutmou *et al.* 2015), which may explain why EGFP expression was lower in the cells transfected with pcDNA3.1-uORF-EGFP than with pcDNA3.1-EGFP (Fig. 7A and 7B).

An increasing number of uORF-encoded peptides have been identified and shown to repress the downstream ORF expression by triggering ribosome stalling or suppressing reinitiation (Wilson and Beckmann 2011; Ito and Chiba 2013; Starck *et al.* 2016). Our data demonstrated that the PPAR $\gamma$ 1 uORF repressed downstream ORF expression and that it could be translated. This raised the question of whether this uORF-encoded peptide represses downstream ORF translation. To this end, we constructed a uORF expression vector, pcDNA3.1-uORF, and co-transfected pcDNA3.1-uORF and PPAR $\gamma$ 1-5'UTR-WT or PPAR $\gamma$ 1-5'UTR-Mut into DF1 cells. Unexpectedly, reporter gene assays showed that transfection of pcDNA3.1-uORF

increased reporter gene activities of both PPAR $\gamma$ 1-5'UTR-WT and PPAR $\gamma$ 1-5'UTR-Mut (Fig. S2). This result suggested that this uORF-encoded peptide may repress the downstream PPAR $\gamma$ 1 translation in *cis*, but not in *trans*. It has been reported that several uORF-encoded peptides act in *cis* on the ribosome during their own translation to stall translation. Arrest of translation can occur either during translation elongation, as seen for SecM (Tsai *et al.* 2014) and VemP (Vazquez-Laslop *et al.* 2008), or during translation termination; for example, in the tryptophanase C (TnaC) (Gong *et al.* 2001) and S-adenosyl-methionine decarboxylase (SAM-DC) (Raney *et al.* 2002).

Based on our data, we speculated that uORF repressed PPAR $\gamma$ 1 translation by two possible mechanisms. The first was ribosome stalling (Fig. 8A), in which uATG is recognized by the scanning 40S ribosomal subunit and associated initiation factors, the uORF is translated, and the nascent peptide stalls the ribosome in the ribosome exit tunnel, thereby hampering the progression of upstream ribosomes (Wilson 2011; Brandman *et al.* 2012; Wilson *et al.* 2016). Only a tiny minority of ribosomes may leaky-scan the uORF start codon and translate the PPAR $\gamma$ 1 coding sequence. Consequently, the translational efficiency of PPAR $\gamma$ 1 is dramatically attenuated.

The other possible mechanism is translational reinitiation, in which ribosomes translate the uORF and remain associated with the mRNA, continue scanning, and reinitiate further downstream at either a proximal or distal AUG codon (Fig. 8B). However, reinitiation efficiency is substantially reduced (Roy *et al.* 2010; Hinnebusch *et al.* 2016) and translation of PPAR $\gamma$ 1 inhibited. Recently, some nascent peptides of

uORFs have been reported to be involved in the suppression of reinitiation (Ito and Chiba 2013; Seefeldt *et al.* 2015). We speculate that the uORF-encoded peptide may contribute to suppression of PPAR $\gamma$ 1 translation.

In addition, several studies have implicated that uORF-containing mRNA has the potential to trigger the nonsense-mediated decay (NMD) pathway. NMD is one of the better characterized posttranscriptional control mechanisms, whereby transcripts harboring premature translation termination codons are degraded (Mendell *et al.* 2004). In the present study, we detected no significant effect of uORF mutation on *hRluc* mRNA stability (Fig. 4 and Fig. 6A). Therefore, we can rule out the possibility that PPAR $\gamma$ 1 uORF modulates PPAR $\gamma$ 1 expression by triggering the NMD pathway.

PPAR $\gamma$  is a master regulator of adipogenesis, whole-body lipid metabolism, and insulin sensitivity. Accumulating evidence shows that adipogenesis and lipid metabolism are different between mammals and chickens (Prigge and Grande 1971; Ji *et al.* 2012). For example, unlike that in mammals, chicken adipocyte lipolysis is almost exclusively regulated by glucagon, and chicken adipose tissue is not sensitive to insulin (Dupont *et al.* 2012; Ji *et al.* 2012; Wang *et al.* 2017). In the present study, we demonstrated that the uORF represses chicken PPAR $\gamma$ 1 translation, and bioinformatics analysis showed that PPAR $\gamma$  5' UTRs have very low sequence similarity between humans, mice, and chickens; no uORF element is present in the 5' UTRs of human and mouse PPAR $\gamma$  transcripts. Our data suggest that the posttranscriptional regulation of the *PPAR $\gamma$*  gene by the 5' UTR differs between mammals and chickens, which may contribute to differences in adipogenesis, adipose

development, and insulin sensitivity between mammals and chickens. It is worth further exploring the roles and underlying mechanisms of PPAR $\gamma$  5' UTRs. A better understanding of PPAR $\gamma$  5' UTRs may provide clues for treating obesity, type 2 diabetes, and insulin resistance.

In summary, for the first time, we demonstrated that a uORF represses chicken PPAR $\gamma$ 1 translation.

## Acknowledgments

We thank Louise Adam, ELS(D), from Liwen Bianji, Edanz Editing China ([www.liwenbianji.cn/ac](http://www.liwenbianji.cn/ac)) for editing the English text of a draft of this manuscript. This work was supported by the National Natural Science Foundation of China (No. 31572392) and the China Agriculture Research System (No. CARS-41).

## Conflict of interest

The authors declare that they have no conflicts of interest with the contents of this article.

## Author contributions

Y Chu designed the experiments, collected and analyzed data, and wrote the manuscript. J Huang, G Ma, T Cui, X Yan and H Li participated in scientific discussions and provided technical assistances. N Wang supervised the study and wrote the manuscript with Y Chu.

# References

- Ahmadian, M., J. M. Suh, N. Hah, C. Liddle, A. R. Atkins *et al.*, 2013 PPARgamma signaling and metabolism: the good, the bad and the future. *Nat Med* 19: 557-566.
- Aprile, M., M. R. Ambrosio, V. D'Esposito, F. Beguinot, P. Formisano *et al.*, 2014 PPARG in Human Adipogenesis: Differential Contribution of Canonical Transcripts and Dominant Negative Isoforms. *PPAR Res* 2014: 537865.
- Araujo, P. R., K. Yoon, D. Ko, A. D. Smith, M. Qiao *et al.*, 2012 Before It Gets Started: Regulating Translation at the 5' UTR. *Comp Funct Genomics* 2012: 475731.
- Barbosa, C., I. Peixeiro and L. Romao, 2013 Gene expression regulation by upstream open reading frames and human disease. *PLoS Genet* 9: e1003529.
- Brandman, O., J. Stewart-Ornstein, D. Wong, A. Larson, C. C. Williams *et al.*, 2012 A ribosome-bound quality control complex triggers degradation of nascent peptides and signals translation stress. *Cell* 151: 1042-1054.
- Buchan, D. W., F. Minneci, T. C. Nugent, K. Bryson and D. T. Jones, 2013 Scalable web services for the PSIPRED Protein Analysis Workbench. *Nucleic Acids Res* 41: W349-357.
- Bugaut, A., and S. Balasubramanian, 2012 5'-UTR RNA G-quadruplexes: translation regulation and targeting. *Nucleic Acids Res* 40: 4727-4741.
- Calvo, S. E., D. J. Pagliarini and V. K. Mootha, 2009 Upstream open reading frames cause widespread reduction of protein expression and are polymorphic among

- humans. *Proc Natl Acad Sci U S A* 106: 7507-7512.
- Cariou, B., B. Charbonnel and B. Staels, 2012 Thiazolidinediones and PPARgamma agonists: time for a reassessment. *Trends Endocrinol Metab* 23: 205-215.
- Ceraj, I., J. T. Riley and C. Shubert, 2009 *StarHPC - Teaching Parallel Programming within Elastic Compute Cloud*.
- Chandra, M., S. Miriyala and M. Panchatcharam, 2017 PPARgamma and Its Role in Cardiovascular Diseases. *PPAR Res* 2017: 6404638.
- Chang, T. H., H. Y. Huang, B. K. Hsu, S. L. Weng, J. T. Horng *et al.*, 2013 An enhanced computational platform for investigating the roles of regulatory RNA and for identifying functional RNA motifs. *Bmc Bioinformatics* 14: S4-S4.
- Crowe, M. L., X. Q. Wang and J. A. Rothnagel, 2006 Evidence for conservation and selection of upstream open reading frames suggests probable encoding of bioactive peptides. *BMC Genomics* 7: 16.
- Cui, T., T. Xing, J. Huang, F. Mu, Y. Jin *et al.*, 2018 Nuclear Respiratory Factor 1 Negatively Regulates the P1 Promoter of the Peroxisome Proliferator-Activated Receptor-gamma Gene and Inhibits Chicken Adipogenesis. *Front Physiol* 9: 1823.
- Dikstein, R., 2012 Transcription and translation in a package deal: the TISU paradigm. *Gene* 491: 1-4.
- Duan, K., Y. Sun, X. Zhang, T. Zhang, W. Zhang *et al.*, 2015 Identification and characterization of transcript variants of chicken peroxisome



- proliferator-activated receptor gamma. *Poult Sci* 94: 2516-2527.
- Dupont, J., S. Metayer-Coustard, B. Ji, C. Rame, C. Gespach *et al.*, 2012  
Characterization of major elements of insulin signaling cascade in chicken  
adipose tissue: apparent insulin refractoriness. *Gen Comp Endocrinol* 176:  
86-93.
- Dvir, S., L. Velten, E. Sharon, D. Zeevi, L. B. Carey *et al.*, 2013 Deciphering the  
rules by which 5'-UTR sequences affect protein expression in yeast. *Proc Natl  
Acad Sci U S A* 110: E2792-2801.
- Gong, F., ., K. Ito, ., Y. Nakamura, . and C. Yanofsky, . 2001 The mechanism of  
tryptophan induction of tryptophanase operon expression: tryptophan inhibits  
release factor-mediated cleavage of TnaC-peptidyl-tRNA(Pro). *Proceedings of  
the National Academy of Sciences of the United States of America* 98:  
8997-9001.
- Grillo, G., A. Turi, F. Licciulli, F. Mignone, S. Liuni *et al.*, 2010 UTRdb and UTRsite  
(RELEASE 2010): a collection of sequences and regulatory motifs of the  
untranslated regions of eukaryotic mRNAs. *Nucleic Acids Res* 38: D75-80.
- Hayden, C. A., and R. A. Jorgensen, 2007 Identification of novel conserved peptide  
uORF homology groups in Arabidopsis and rice reveals ancient eukaryotic  
origin of select groups and preferential association with transcription  
factor-encoding genes. *BMC Biol* 5: 32.
- Hinnebusch, A. G., I. P. Ivanov and N. Sonenberg, 2016 Translational control by  
5'-untranslated regions of eukaryotic mRNAs. *Science* 352: 1413-1416.

- Hofacker, I. L., 2003 Vienna RNA secondary structure server. *Nucleic Acids Res* 31: 3429-3431.
- Hood, H. M., D. E. Neafsey, J. Galagan and M. S. Sachs, 2009 Evolutionary roles of upstream open reading frames in mediating gene regulation in fungi. *Annu Rev Microbiol* 63: 385-409.
- Iacono, M., F. Mignone and G. Pesole, 2005 uAUG and uORFs in human and rodent 5'untranslated mRNAs. *Gene* 349: 97-105.
- Ito, K., and S. Chiba, 2013 Arrest peptides: cis-acting modulators of translation. *Annu Rev Biochem* 82: 171-202.
- Ji, B., B. Ernest, J. R. Gooding, S. Das, A. M. Saxton *et al.*, 2012 Transcriptomic and metabolomic profiling of chicken adipose tissue in response to insulin neutralization and fasting. *BMC Genomics* 13: 441.
- Johansson, M., K. W. Jeong, S. Trobro, P. Strazewski, J. Aqvist *et al.*, 2011 pH-sensitivity of the ribosomal peptidyl transfer reaction dependent on the identity of the A-site aminoacyl-tRNA. *Proc Natl Acad Sci U S A* 108: 79-84.
- Katsura, S., T. Okumura, R. Ito, A. Sugawara and A. Yokoyama, 2014 Identification of Posttranslational Modifications in Peroxisome Proliferator-Activated Receptor gamma Using Mass Spectrometry. *PPAR Res* 2014: 468925.
- Koutmou, K. S., A. P. Schuller, J. L. Brunelle, A. Radhakrishnan, S. Djuranovic *et al.*, 2015 Ribosomes slide on lysine-encoding homopolymeric A stretches. *Elife* 4.
- Kubokawa, I., Y. Takeshima, M. Ota, M. Enomoto, Y. Okizuka *et al.*, 2010 Molecular characterization of the 5'-UTR of retinal dystrophin reveals a

- cryptic intron that regulates translational activity. *Mol Vis* 16: 2590-2597.
- Lee, J. E., and K. Ge, 2014 Transcriptional and epigenetic regulation of PPARgamma expression during adipogenesis. *Cell Biosci* 4: 29.
- Lefterova, M. I., A. K. Haakonsson, M. A. Lazar and S. Mandrup, 2014 PPARgamma and the global map of adipogenesis and beyond. *Trends Endocrinol Metab* 25: 293-302.
- Lehrke, M., and M. A. Lazar, 2005 The many faces of PPARgamma. *Cell* 123: 993-999.
- Livak, K. J., and T. D. Schmittgen, 2001 Analysis of relative gene expression data using real-time quantitative PCR and the 2(-Delta Delta C(T)) Method. *Methods* 25: 402-408.
- Mcclelland, S., R. Shrivastava and J. D. Medh, 2014 Regulation of Translational Efficiency by Disparate 5' UTRs of PPARgamma Splice Variants. *Ppar Research* 2009: 193413.
- Mendell, J. T., N. A. Sharifi, J. L. Meyers, F. Martinez-Murillo and H. C. Dietz, 2004 Nonsense surveillance regulates expression of diverse classes of mammalian transcripts and mutes genomic noise. *Nat Genet* 36: 1073-1078.
- Mitchell, S. F., S. E. Walker, M. A. Algire, E. H. Park, A. G. Hinnebusch *et al.*, 2010 The 5'-7-methylguanosine cap on eukaryotic mRNAs serves both to stimulate canonical translation initiation and to block an alternative pathway. *Mol Cell* 39: 950-962.
- Nasif, S., L. Contu and O. Muhlemann, 2018 Beyond quality control: The role of

- nonsense-mediated mRNA decay (NMD) in regulating gene expression.
- Semin Cell Dev Biol 75: 78-87.
- Normann, K. R., K. A. B. Øystese, J. P. Berg, T. Lekva, J. Berg-Johnsen *et al.*, 2016
- Selection and validation of reliable reference genes for RT-qPCR analysis in a large cohort of pituitary adenomas. Molecular & Cellular Endocrinology 437: 183-189.
- Prigge, W. F., and F. Grande, 1971 Effects of glucagon, epinephrine and insulin on in vitro lipolysis of adipose tissue from mammals and birds. Comp Biochem Physiol B 39: 69-82.
- Raney, A., G. L. Law, G. J. Mize and D. R. Morris, 2002 Regulated translation termination at the upstream open reading frame in s-adenosylmethionine decarboxylase mRNA. J Biol Chem 277: 5988-5994.
- Romero, P., Z. Obradovic, X. Li, E. C. Garner, C. J. Brown *et al.*, 2001 Sequence complexity of disordered protein. Proteins 42: 38-48.
- Roy, B., J. N. Vaughn, B. H. Kim, F. Zhou, M. A. Gilchrist *et al.*, 2010 The h subunit of eIF3 promotes reinitiation competence during translation of mRNAs harboring upstream open reading frames. Rna 16: 748-761.
- Sathirapongsasuti, J. F., N. Sathira, Y. Suzuki, C. Huttenhower and S. Sugano, 2011 Ultraconserved cDNA segments in the human transcriptome exhibit resistance to folding and implicate function in translation and alternative splicing. Nucleic Acids Res 39: 1967-1979.
- Seefeldt, A. C., F. Nguyen, S. Antunes, N. Perebaskine, M. Graf *et al.*, 2015 The

- proline-rich antimicrobial peptide Onc112 inhibits translation by blocking and destabilizing the initiation complex. *Nat Struct Mol Biol* 22: 470-475.
- Starck, S. R., J. C. Tsai, K. Chen, M. Shodiya, L. Wang *et al.*, 2016 Translation from the 5' untranslated region shapes the integrated stress response. *Science* 351: aad3867.
- Suzuki, Y., D. Ishihara, M. Sasaki, H. Nakagawa, H. Hata *et al.*, 2000 Statistical analysis of the 5' untranslated region of human mRNA using "Oligo-Capped" cDNA libraries. *Genomics* 64: 286-297.
- Tsai, A., G. Kornberg, M. Johansson, J. Chen and J. Puglisi, 2014 The Dynamics of SecM-Induced Translational Stalling. *Cell Reports* 7: 1521-1533.
- van Beekum, O., V. Fleskens and E. Kalkhoven, 2009 Posttranslational modifications of PPAR-gamma: fine-tuning the metabolic master regulator. *Obesity (Silver Spring)* 17: 213-219.
- Vazquez-Laslop, N., C. Thum and A. S. Mankin, 2008 Molecular mechanism of drug-dependent ribosome stalling. *Mol Cell* 30: 190-202.
- Wang, W., T. Zhang, C. Wu, S. Wang, Y. Wang *et al.*, 2017 immortalization of chicken preadipocytes by retroviral transduction of chicken TERT and TR. *Plos One* 12: e0177348-.
- Wen, Y., Y. Liu, Y. Xu, Y. Zhao, R. Hua *et al.*, 2009 Loss-of-function mutations of an inhibitory upstream ORF in the human hairless transcript cause Marie Unna hereditary hypotrichosis. *Nat Genet* 41: 228-233.
- Wilson, D. N., 2011 Peptides in the ribosomal tunnel talk back. *Mol Cell* 41: 247-248.

- Wilson, D. N., S. Arenz and R. Beckmann, 2016 Translation regulation via nascent polypeptide-mediated ribosome stalling. *Curr Opin Struct Biol* 37: 123-133.
- Wilson, D. N., and R. Beckmann, 2011 The ribosomal tunnel as a functional environment for nascent polypeptide folding and translational stalling. *Curr Opin Struct Biol* 21: 274-282.
- Xia, X., and M. Holcik, 2009 Strong eukaryotic IRESs have weak secondary structure. *PLoS One* 4: e4136.
- Yamashita, R., Y. Suzuki, N. Takeuchi, H. Wakaguri, T. Ueda *et al.*, 2008 Comprehensive detection of human terminal oligo-pyrimidine (TOP) genes and analysis of their characteristics. *Nucleic Acids Res* 36: 3707-3715.

## Figures and Legends:

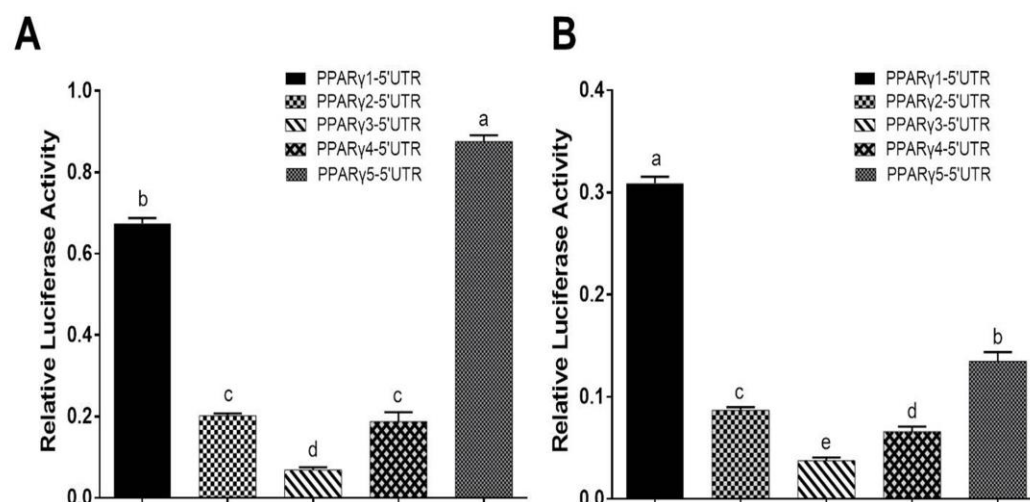

**Figure 1. Effects of PPAR $\gamma$  5' UTR isoforms on reporter gene activity.**

(A) The luciferase activity of each of the PPAR $\gamma$  5' UTR reporter constructs was measured in DF1 cells. (B) The luciferase activity of each of the PPAR $\gamma$  5' UTR reporter constructs was measured in ICP1 cells. Data are expressed as mean  $\pm$  SEM ( $n \geq 3$  independent experiments). Bars with different superscripts are statistically different ( $P < 0.05$ ).

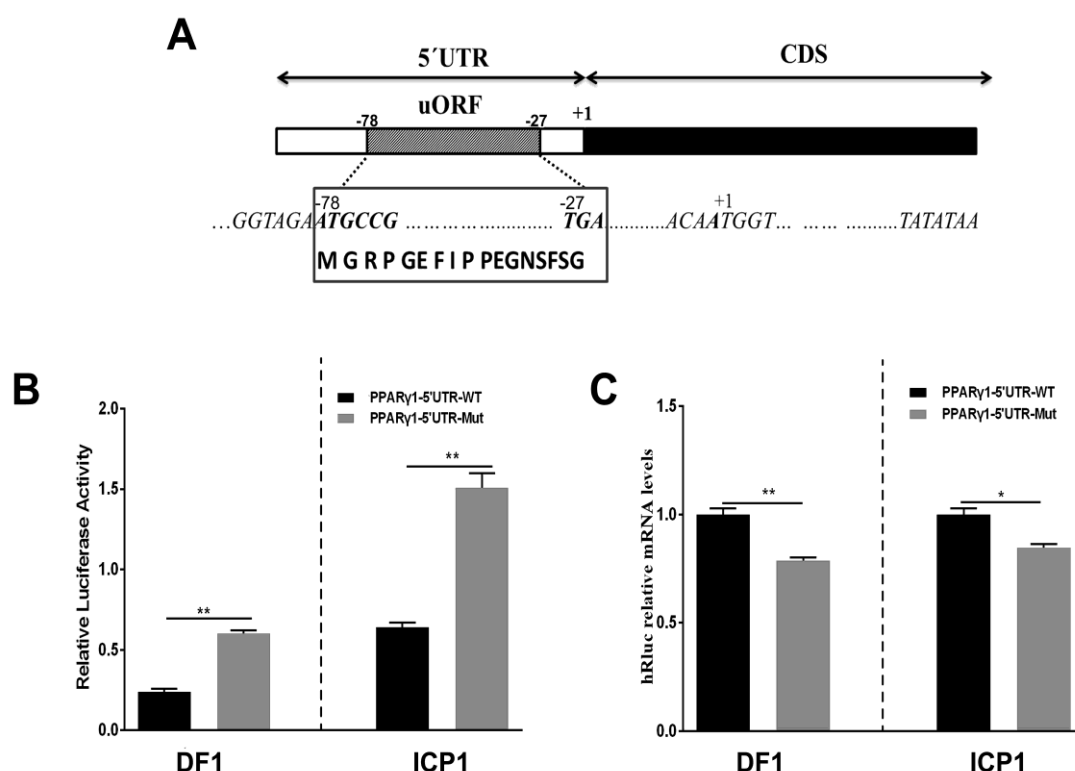

**Figure 2. Schematic representation of PPAR $\gamma$ 1 5' UTR and effects of the PPAR $\gamma$ 1 uORF mutation on *hRluc* luciferase activity and mRNA expression.**

(A) A schematic diagram of the 117- nucleotide-long PPAR $\gamma$ 1 5' UTR, the uORF is from nucleotides -24 to -79 of the 5' UTR, and indicated by a striped rectangle. All positions are numbered relative to the initiation codon ATG of PPAR $\gamma$  transcript 1 (PPAR $\gamma$ 1). The uORF encodes a 17-amino acid peptide with the amino acid sequence shown in the bottom. (B) The effect of uORF mutation on the luciferase reporter gene activity. The wild-type (PPAR $\gamma$ 1-5'UTR-WT) and uORF mutant (PPAR $\gamma$ 1-5'UTR-Mut) PPAR $\gamma$ 1 5' UTR reporter constructs were transfected into ICP1s and DF1 cells, respectively, and reporter gene activity was measured. Compared with the wild-type PPAR $\gamma$ 1 5' UTR reporter, the luciferase activity of



PPAR $\gamma$ 1-5'UTR-Mut was significantly higher than that of PPAR $\gamma$ 1-5'UTR-WT in both ICP1 and DF1 cells ( $n \geq 3$ , \*\*  $P < 0.01$ , Student's  $t$ -test). (C) The *hRluc* mRNA quantification by real-time RT-PCR in the ICP1 and DF1 cells transfected with the indicated reporter constructs. The relative *hRluc* mRNA Levels are normalized to the expression levels of the cells transfected with the reporter PPAR $\gamma$ 1-5'UTR-WT. Data were expressed as the mean  $\pm$  SEM, *NONO* was used as the internal mRNA control.  $n \geq 3$ , \* $P < 0.05$ ; \*\*  $P < 0.01$ , Student's  $t$ -test.

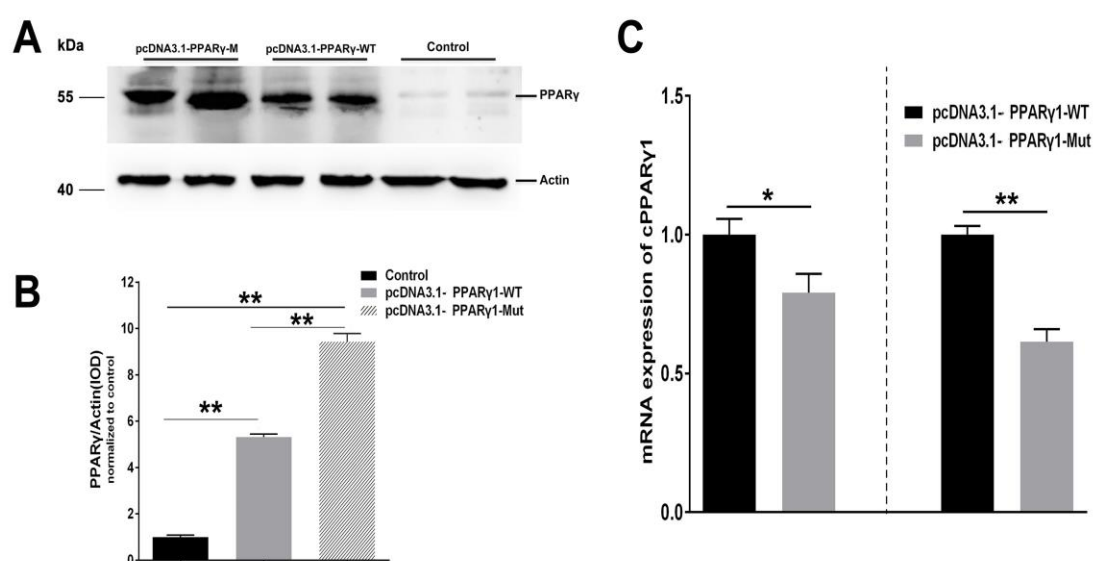

**Figure 3. PPARγ1 translation is inhibited by its 5' UTR uORF.**

(A) Detection of PPARγ1 protein levels. Equal amounts of the total cell lysates from the ICP1 cells transfected with either pcDNA3.1-PPARγ-WT or pcDNA3.1-PPARγ-Mut were separated and immunoblotted with an anti-PPARγ antibody. Actin was used as a loading control. (B) Quantification of PPARγ1 protein expression. Band intensities were measured by ImageJ software normalized to actin loading control. Data represent Mean  $\pm$  SEM. PPARγ1 protein expression was higher in the cells transfected with pcDNA3.1-PPARγ-Mut than in the cells transfected with the pcDNA3.1-PPARγ-WT (\*\* P < 0.01, Student's t-test). (C) Quantification of PPARγ1 mRNA by real-time RT-PCR in the ICP1s and DF1 cells transfected with the indicated constructs. PPARγ1 mRNA levels were normalized to the expression of the cells transfected with pcDNA3.1-PPARγ-WT. Data were expressed as the mean  $\pm$  SEM, NONO was used as the internal mRNA control. n  $\geq$  3, \*P < 0.05; \*\* P < 0.01, Student's t-test.

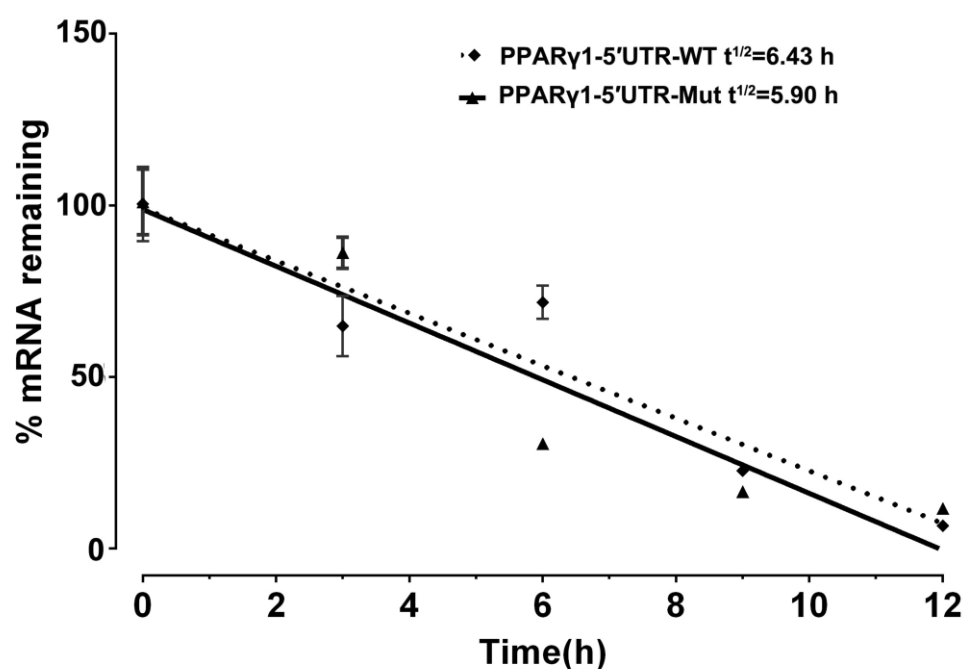

**Figure 4. Effect of uORF mutation on hRluc mRNA stability.**

ICP1 cells were transiently transfected with PPAR $\gamma$ 1-5'UTR-WT or PPAR $\gamma$ 1-5'UTR-Mut, 48 h post-transfection, hRluc mRNA remaining after a 12 h time-course treatment with Actinomycin D was measured by real-time RT-PCR and calculated as a percentage of the level measured at time zero (0 h). Linear regression analysis was used to determine the half-life of the hRluc mRNA ( $t_{1/2}$ ), the time required for degrading 50% of the existing hRluc mRNA molecules at 0 h. No differences in relative mRNA decay rate were observed between the cells transfected with PPAR $\gamma$ 1-5'UTR-WT and PPAR $\gamma$ 1-5'UTR-Mut. Data are expressed as the mean  $\pm$  SEM relative to NONO expression.

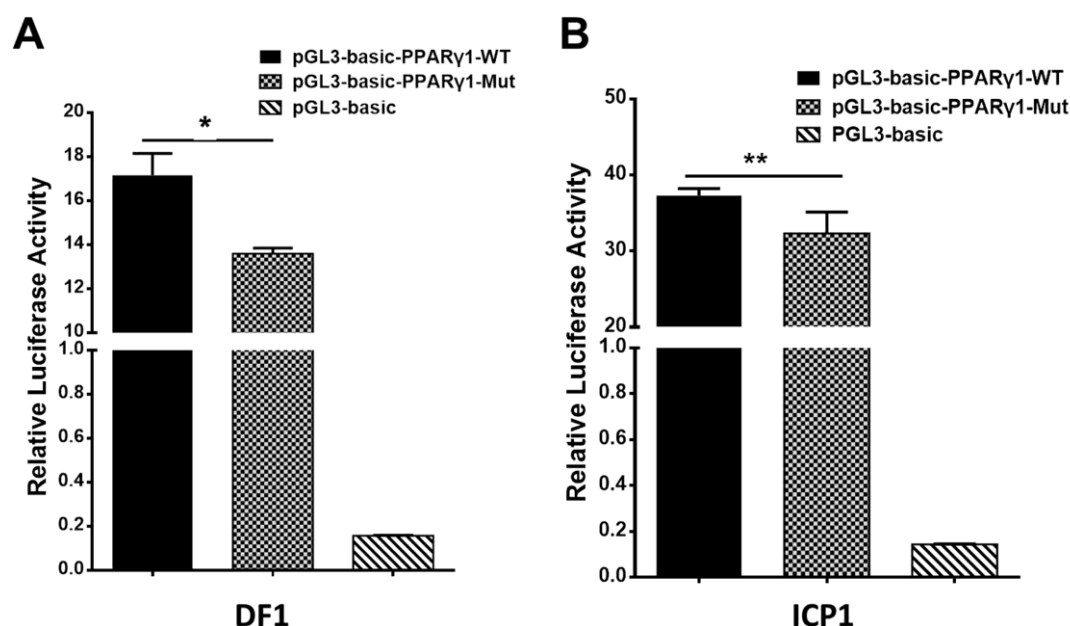

**Figure 5. The promoter activity analysis of the DNA sequences corresponding wild-type and uORF-mutated 5' UTRs of PPAR $\gamma$ 1.**

The DNA sequences corresponding wild-type and uORF-mutated 5' UTRs of PPAR $\gamma$ 1 were cloned into luciferase reporter vector pGL3-basic to yield pGL3-PPAR $\gamma$ 1-WT and pGL3-PPAR $\gamma$ 1-Mut, respectively. The indicated reporters along with the pRL-TK Renilla luciferase vector were transiently transfected into DF1 (A) and ICP1 cells (B), and the luciferase activity was determined at 48 h after transfection. The pRL-TK vector was used for normalization of transfection efficiency. All data represent the mean  $\pm$  SEM. \*\*  $p < 0.01$ , Student's t-test.

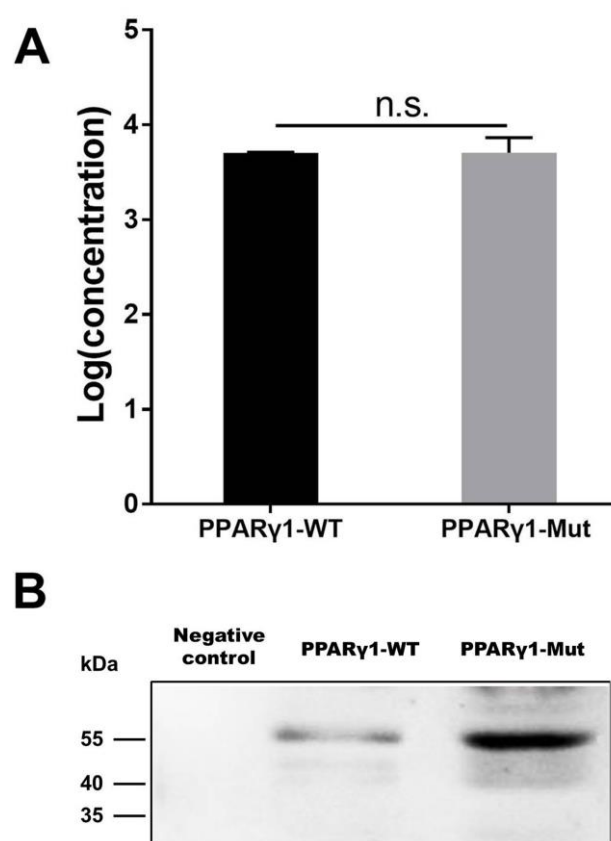

**Figure 6. The uORF represses in vitro PPAR $\gamma$ 1 translation.**

(A) In vitro transcribed PPAR $\gamma$ 1 mRNAs from the wild-type and uORF-mutant PPAR $\gamma$ 1 expression vectors (pcDNA3.1-PPAR $\gamma$ 1-WT and pcDNA3.1-PPAR $\gamma$ 1-Mut) were analyzed by quantitative real-time RT-PCR. No difference in PPAR $\gamma$ 1 mRNA was observed. Data were expressed as the mean  $\pm$  SEM, n.s., not significant, Student's t-test. (B) Equal amounts of the in vitro transcribed mRNAs (2  $\mu$ g) were used for in vitro translation. Note that the uORF strongly represses PPAR $\gamma$ 1 translation. A in vitro translation reaction without RNA template was used as a negative control.

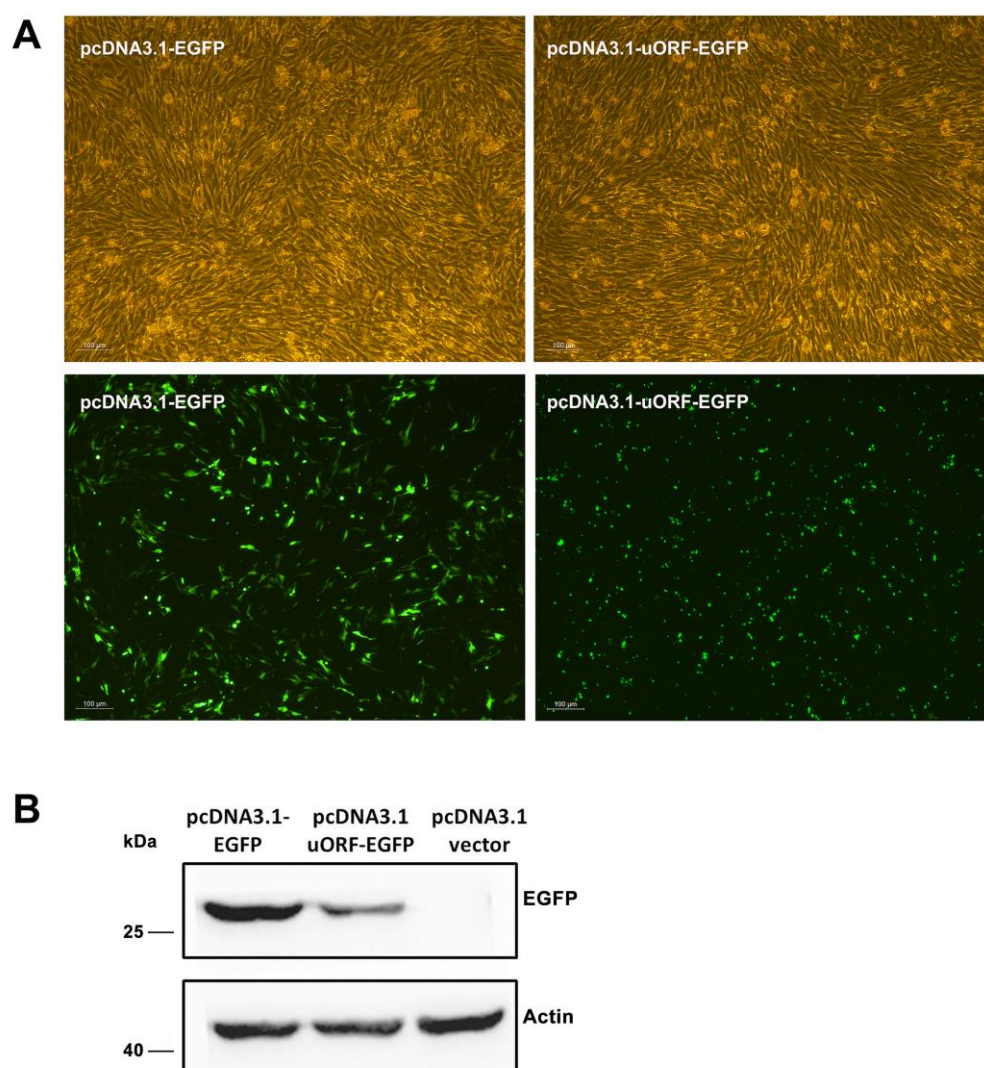

**Figure 7. Translation can be initiated at the uAUG of the PPAR $\gamma$ 1 uORF.**

(A) The pcDNA3.1-EGFP and pcDNA3.1-uORF-EGFP were respectively transiently transfected into ICP1 cells, 48 h post-transfection, the green fluorescence signal was visualized under a fluorescence microscope. (B) Lysates from the cells transfected with pcDNA3.1-EGFP and pcDNA3.1-uORF-EGFP, EGFP or uORF-EGFP fusion protein was immunoblotted with an anti-EGFP antibody. Actin was used as a loading control.

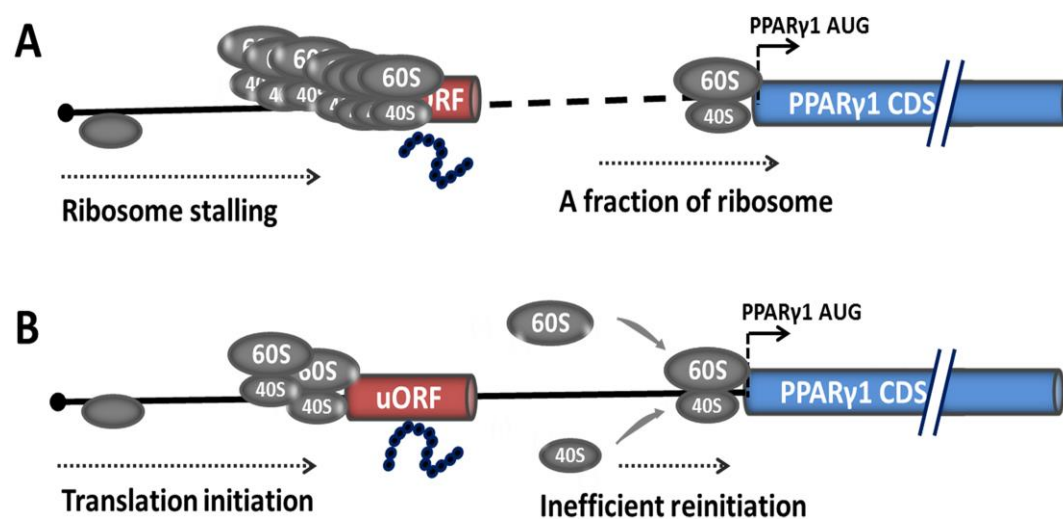

**Figure 8. Potential models for uORF-mediated PPAR $\gamma$ 1 translational inhibition.**

Translational inhibition of PPAR $\gamma$ 1 may be due to uORF-mediated ribosome stalling

(A) or inefficient reinitiation at the authentic start codon of PPAR $\gamma$ 1 (B).

## Supplementary Materials

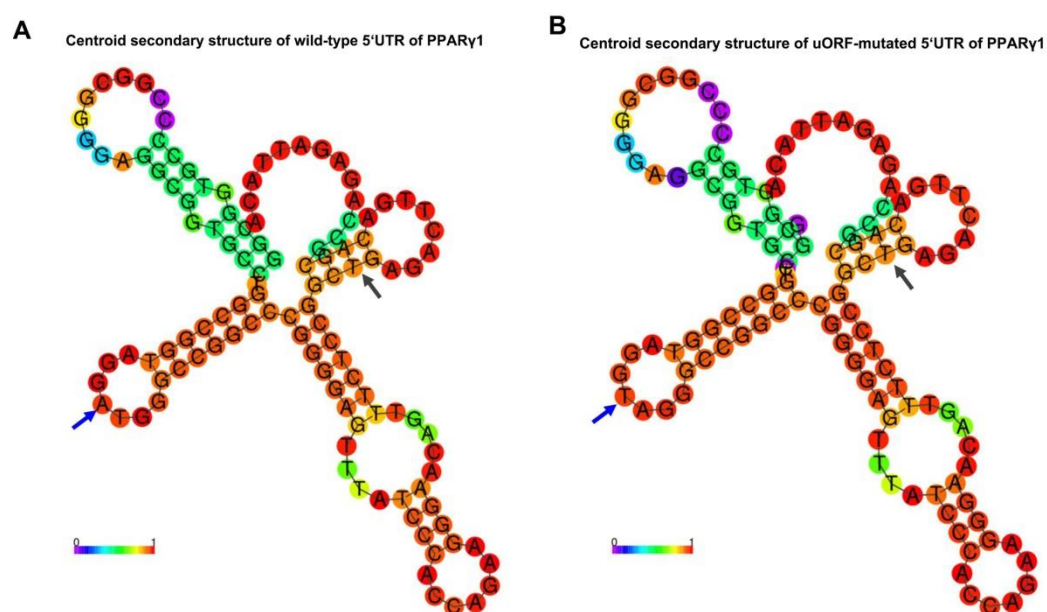

**Supplementary figure 1. Predicted secondary structure of the wild-type and uORF-mutant 5' UTR of chicken *PPAR $\gamma$ 1* mRNA.**

RNAfold 2.0 (<http://rna.tbi.univie.ac.at/cgi-bin/RNAfold.cgi>) was used for structure prediction. The centroid structures encoding base pair probabilities are shown. The bases are colored in violet (0) for low and in *red* (1) for high base-pairing probabilities. The uORF within the 5'UTR are indicated by blue (5' terminal) and black (3' terminal) *arrows*.



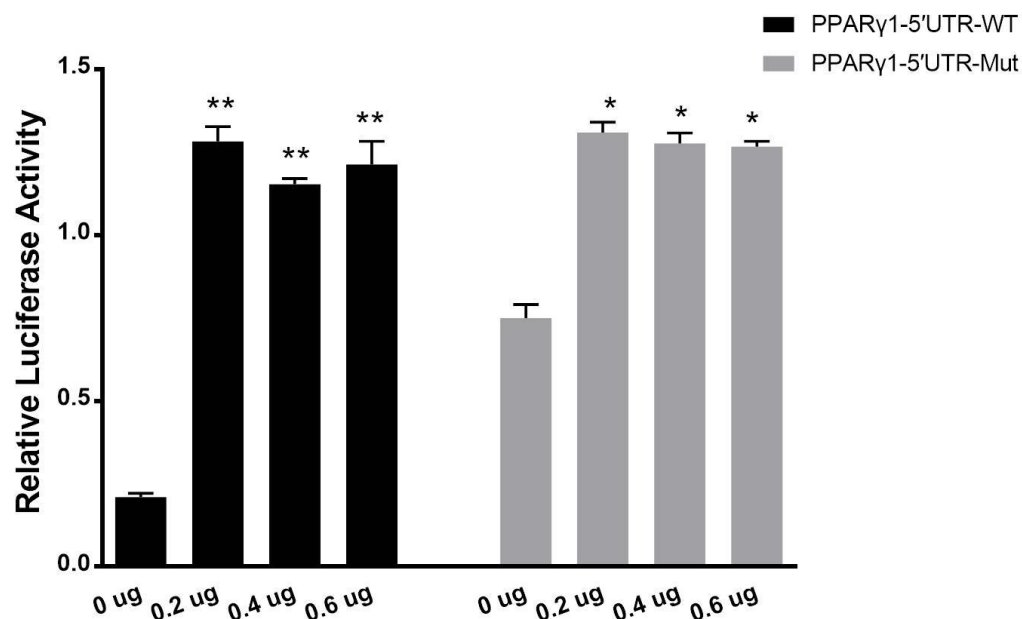

**Supplementary figure 2. The uORF-encoded peptide does not repress the downstream reporter gene translation in *trans*.**

The indicated amounts of the uORF expression vector (pcDNA3.1-uORF) and either PPAR $\gamma$ 1-5'UTR-WT or PPAR $\gamma$ 1-5'UTR-Mut were cotransfected into DF1 cells, respectively, and the luciferase activity was determined at 48 h after transfection.

All data represent the mean  $\pm$  SEM. \* $p < 0.05$ , Student's *t*-test.
